# Supplementary material for: Thinking about Others’ Minds: Mental State Inference in Boys with Conduct Problems and Callous-Unemotional Traits
Source: PubMed Central journal article supplement (PMC7445196; doi:10.1007/s10802-020-00664-1), 2020-07-06
Supplement: 10802_2020_664_MOESM2_ESM.pdf [file 10802_2020_664_MOESM2_ESM.pdf]

Journal of Abnormal Child Psychology

Thinking about others' minds: mental state inference in boys with conduct problems and callous-unemotional traits

Ruth Roberts<sup>1\*</sup>, Eamon McCrory<sup>1</sup>, Geoffrey Bird<sup>2,3</sup>, Molly Sharp<sup>1</sup>, Linda Roberts<sup>4</sup> & Essi Viding<sup>1</sup>

<sup>1</sup>Division of Psychology and Language Sciences, University College London, 26 Bedford Way, London WC1H 0AP, UK

<sup>2</sup>Department of Experimental Psychology, University of Oxford, Oxford, OX1 3PS, UK

<sup>3</sup>MRC Social, Genetic & Developmental Psychiatry Centre, Institute of Psychiatry, Psychology & Neuroscience, King's College London, De Crespigny Park, Denmark Hill, London, SE5 8AF, UK

<sup>4</sup>University of Manitoba, 66 Chancellors Cir, Winnipeg, Manitoba, R3T 2N2, Canada

\*Corresponding author:

Ruth Roberts [r.roberts@ucl.ac.uk](mailto:r.roberts@ucl.ac.uk)

Supplementary Material Table 1. Spearman's Rho Correlations between MASC 'intentions' and child characteristics

|                              |                                    | <i>MASC<br/>'intentions'</i> | <i>Child<br/>group</i> | <i>CASI<br/>ADHD</i> | <i>CASI<br/>GAD</i> | <i>CASI<br/>MDE</i> | <i>BES<br/>cognitive</i> | <i>BES<br/>affective</i> | <i>IRI-PT</i> | <i>AQC</i> |
|------------------------------|------------------------------------|------------------------------|------------------------|----------------------|---------------------|---------------------|--------------------------|--------------------------|---------------|------------|
| <i>MASC<br/>'intentions'</i> | <i>Correlation<br/>Coefficient</i> | 1.00                         | <b>-.32**</b>          | <b>-.28*</b>         | <b>-.29**</b>       | -.15                | <b>.40**</b>             | <b>.29**</b>             | .19           | -.13       |
|                              | <i>Sig. (2-<br/>tailed)</i>        | .                            | .003                   | .011                 | .009                | .181                | .000                     | .009                     | .082          | .239       |
|                              | <i>N</i>                           | 81                           | 81                     | 81                   | 79                  | 80                  | 80                       | 80                       | 81            | 80         |
| <i>Child<br/>group</i>       | <i>Correlation<br/>Coefficient</i> | <b>-.32**</b>                | 1.00                   | <b>.52**</b>         | <b>.48**</b>        | <b>.49**</b>        | <b>-.23*</b>             | <b>-.39**</b>            | <b>-.34**</b> | -.04       |
|                              | <i>Sig. (2-<br/>tailed)</i>        | .003                         | .                      | .000                 | .000                | .000                | .040                     | .000                     | .002          | .752       |
|                              | <i>N</i>                           | 81                           | 81                     | 81                   | 79                  | 80                  | 80                       | 80                       | 81            | 80         |

MASC = Movie Assessment of Social Cognition ('intentions' items); CASI = Child and Adolescent Symptom Inventory; ADHD = Attention Deficit Hyperactivity Disorder; GAD = Generalised Anxiety Disorder; MDE = Major Depressive Episode; BES = Basic Empathy Scale (cognitive items / affective items); IRI-PT = Perspective taking subscale of the Interpersonal Reactivity Index; AQC = Alexithymia Questionnaire for Children
